1 **Title:** Microbial community-scale metabolic modeling predicts personalized short-chain-fatty-  
2 acid production profiles in the human gut.

3  
4 **Authors:** Nick Bohmann<sup>1,2</sup>, Tomasz Wilmanski<sup>1</sup>, Lisa Levy<sup>3</sup>, Johanna W. Lampe<sup>3</sup>, Thomas  
5 Gurry<sup>4,5</sup>, Noa Rappaport<sup>1</sup>, Christian Diener<sup>1,\*</sup>, Sean M. Gibbons<sup>1,2,6,7,\*</sup>

6  
7 **Affiliations:** <sup>1</sup> Institute for Systems Biology, Seattle, WA 98109, USA; <sup>2</sup> Molecular Engineering  
8 Graduate Program, University of Washington, Seattle, WA 98195, USA; <sup>3</sup> Fred Hutchinson  
9 Cancer Center, Seattle, WA 98109, USA; <sup>4</sup> Pharmaceutical Biochemistry Group, School of  
10 Pharmaceutical Sciences, University of Geneva, Switzerland; <sup>5</sup> Myota GmbH, Berlin, Germany; <sup>6</sup>  
11 Departments of Bioengineering and Genome Sciences, University of Washington, Seattle, WA  
12 98195, USA; <sup>7</sup> eScience Institute, University of Washington, Seattle, WA 98195, USA; \*  
13 correspondence can be addressed to [cdiener@isbscience.org](mailto:cdiener@isbscience.org) and [sgibbons@isbscience.org](mailto:sgibbons@isbscience.org)

#### 14 15 **Abstract**

16 Microbially-derived short-chain fatty acids (SCFAs) in the human gut are tightly coupled to host  
17 metabolism, immune regulation, and integrity of the intestinal epithelium. However, the  
18 production of SCFAs can vary widely between individuals consuming the same diet, with lower  
19 levels often associated with disease. A mechanistic understanding of this heterogeneity is  
20 lacking. We present a microbial community-scale metabolic modeling (MCMM) approach to  
21 predict individual-specific SCFA production profiles. We assess the quantitative accuracy of our  
22 MCMMs using *in vitro*, *ex vivo*, and *in vivo* data. Next, we identify associations between MCMM  
23 SCFA predictions and a panel of blood-based clinical chemistries in a large human cohort.  
24 Finally, we demonstrate how MCMMs can be leveraged to design personalized dietary,  
25 prebiotic, and probiotic interventions that optimize SCFA production in the gut. Our results  
26 represent an important advance in engineering gut microbiome functional outputs for precision  
27 health and nutrition.

#### 28 29 **Keywords**

30 gut microbiome, short chain fatty acids, flux balance analysis, metabolic model, precision  
31 nutrition

32  
33

34

35

36

37

38

39

40

41

## 42 Introduction

43 The human gut microbiota maintains intestinal barrier function, regulates peripheral and  
44 systemic inflammation, and breaks down indigestible dietary components and host substrates  
45 into a wide range of bioactive compounds<sup>1,2</sup>. One of the primary mechanisms by which the gut  
46 microbiota impacts human health is through the production of small molecules that enter the  
47 circulation and are absorbed and transformed by host tissues<sup>3-5</sup>. Approximately half of the  
48 metabolites detected in human blood are known to be significantly associated with cross-  
49 sectional variation in gut microbiome composition<sup>6</sup>.

50 Short-chain-fatty-acids (SCFAs) are among the most abundant metabolic byproducts  
51 produced by the gut microbiota, largely through the fermentation of indigestible dietary fibers  
52 and resistant starches, with acetate, propionate and butyrate being the most abundant SCFAs<sup>7-</sup>  
53 <sup>9</sup>. Deficits in SCFA production have been repeatedly associated with disease<sup>10,11</sup>. Therefore,  
54 SCFA production is a crucial ecosystem service that the gut microbiota provides to its host, with  
55 far-reaching impacts on health<sup>1,11-13</sup>. However, different human gut microbiota provided with the  
56 same exact dietary substrate can show variable SCFA production profiles<sup>14,15</sup>, and predicting  
57 this heterogeneity remains a fundamental challenge to the microbiome field. Measuring SCFA  
58 abundances in blood or feces is rarely informative of *in situ* production rates, due to the volatility  
59 of SCFAs, cross-feeding among microbes, and the rapid consumption and transformation of  
60 these metabolites by the colonic epithelium<sup>10,16,17</sup>. Furthermore, SCFA production fluxes (i.e.,  
61 the amount of a metabolite produced over a given period of time) within an individual can vary  
62 longitudinally, depending upon dietary inputs and the availability of host substrates<sup>18</sup>. In order to  
63 account for this inter- and intra-individual heterogeneity, we propose the use of microbial  
64 community-scale metabolic models (MCMs), which mechanistically account for metabolic  
65 interactions between gut microbes, host substrates, and dietary inputs, to estimate  
66 personalized, context-specific SCFA production profiles.

67           Statistical modeling and machine-learning approaches for predicting metabolic output  
68 from the microbiome have shown promising results in recent years. For example, postprandial  
69 blood glucose responses can be predicted by machine-learning algorithms trained on large  
70 human cohorts <sup>19,20</sup>. However, machine-learning methods are limited by the measurements and  
71 interventions represented within the training data <sup>21</sup>. Mechanistic models like MCMMs, on the  
72 other hand, do not rely on training data and provide causal insights <sup>17</sup>. MCMMs are constructed  
73 using existing knowledge bases, including curated genome-scale metabolic models (GEMs) of  
74 individual taxa <sup>22</sup>. MCMMs can be limited by the inability to find well-curated GEMs for abundant  
75 taxa present in certain samples, and this underrepresentation in GEMs tends to be worse in  
76 human populations that are generally underrepresented in microbiome research <sup>23</sup>. Despite  
77 this, MCMMs can be powerful, transparent, knowledge-driven tools for predicting community-  
78 specific responses to a wide array of interventions or perturbations.

79           Here, we demonstrate the utility of MCMMs for the prediction of personalized SCFA  
80 production profiles in the context of different dietary, prebiotic, and probiotic inputs. We first  
81 validate our modeling platform using synthetic *in vitro* gut microbial communities (N=1,387) and  
82 *ex vivo* stool incubation assays (N=21). Next, we investigate the relevance of this modeling  
83 strategy *in vivo* using data from a 10-week high-fiber dietary intervention cohort (N=18), where  
84 individuals showed a variety of immune responses. We assess the clinical significance of these  
85 precision SCFA predictions by looking at associations between predicted SCFA production on  
86 an average European diet and a panel of blood-based clinical lab tests in a large human cohort  
87 (N=2,687). Finally, we demonstrate the power of MCMMs in designing personalized prebiotic,  
88 probiotic, and dietary interventions that optimize individual-specific butyrate production rates.

89

## 90 **Results**

91 *MCMMs capture SCFA production rates in vitro*

92 We sought to investigate whether MCMs can predict production rates of the major SCFAs  
93 (i.e., acetate, propionate, and butyrate) under controlled experimental conditions (**Fig. 1**). We  
94 assembled microbial community models for *in vitro* data sets spanning 4 independent studies  
95 with varying levels of complexity. Models were constructed by combining manually-curated  
96 GEMs from the AGORA database <sup>24</sup>, constraining taxon abundances using 16S amplicon  
97 sequencing relative abundance estimates, and applying an appropriate growth medium.  
98 Sample-specific metabolic models were then solved using cooperative tradeoff flux balance  
99 analysis (ctFBA), a previously-reported two-step quadratic optimization strategy that yields  
100 empirically-validated estimates of the steady state growth rates and metabolic uptake and  
101 secretion fluxes for each taxon in the model <sup>17</sup> (see Materials and Methods). Models were  
102 summarized at the genus level, which was the finest level of phylogenetic resolution that the  
103 16S data allowed for.

104 First, we looked at data from synthetically constructed *in vitro* cultures of human gut  
105 microbial communities obtained from a recent publication <sup>25</sup>. This data set included  
106 measurements of relative microbial abundances, butyrate production levels, and the overall  
107 optical density for each of 1,387 independent co-cultures (**Fig. 2A**). Cultures varied in richness  
108 from 1-25 strains. MCMs were constructed for each co-culture as described above, simulating  
109 growth of each of the models using a defined, componentized medium, matching the  
110 composition of the medium used in the *in vitro* experiments (see Material and Methods). Model-  
111 predicted fluxes of butyrate were compared with measured butyrate production rates normalized  
112 to the OD600, stratifying results into low richness (1-5 genera) and high richness (10-25 genera)  
113 communities. Model predictions for butyrate production fluxes were significantly associated with  
114 measured butyrate production fluxes (Pearson's correlation; Low Richness:  $R^2=0.028$ ,  $p=5e-4$ ;  
115 High Richness:  $R^2=0.277$ ,  $p=6e-51$ ), but predictions were more accurate in the higher richness  
116 communities (**Fig. 2B-C**).

117           Next, we compared MCMM predictions to anaerobic *ex vivo* incubations of human stool  
118 samples from a small number of individuals (N=21) cultured after supplementation with sterile  
119 PBS buffer or with different dietary fibers across three independent studies. Study A contained  
120 samples from two donors cultured for 7 hours, Study B <sup>14</sup> contained samples from 10 donors  
121 cultured for 24 hours, and Study C contained samples from 9 donors cultured for 4 hours. Fecal  
122 *ex vivo* assays allow for the direct measurement of bacterial SCFA production fluxes without  
123 interference from the host. For all three studies, *ex vivo* incubations were performed by  
124 homogenizing fecal material in sterile buffer under anaerobic conditions, adding control or fiber  
125 interventions to replicate fecal slurries, and measuring the resulting SCFA production rates *in*  
126 *vitro* at 37°C (see Materials and Methods). Metagenomic or 16S amplicon sequencing data from  
127 these *ex vivo* cultures were used to construct MCMMs, using relative abundances obtained from  
128 sequencing data as a proxy for relative biomass for each bacterial genus (see Materials and  
129 Methods). MCMMs were simulated using a diluted standardized European diet (i.e., to  
130 approximate residual dietary substrates still present in the stool slurry), with or without specific  
131 fiber amendments, matching the experimental treatments (see Material and Methods). The  
132 resulting SCFA flux predictions were then compared to the measured fluxes. We observed an  
133 agreement between MCMM-predicted and measured SCFA production fluxes across all three  
134 *ex vivo* data sets (**Fig. 3**). Models predicted significantly higher SCFA production fluxes for fiber-  
135 treated samples across all studies (Independent Student's t-test,  $p < 0.05$ ; Study A was omitted  
136 from this analysis due to low sample size, although the separation between controls and fiber-  
137 treated samples is visually apparent). The same held true for measured SCFA fluxes, with the  
138 exception of acetate in Study C (i.e., the study with the shortest incubation time), where there  
139 was not always significant separation in measured SCFA production between control and fiber  
140 treatments (**Fig. 3G-I**). With one exception (**Fig. 3J**), a significant positive correlation was  
141 observed between predicted and measured SCFA fluxes across treatment groups for all three

142 studies ( $R^2=0.22-0.99$ , Pearson test,  $p<0.05$ ). In summary, we observed agreement between  
143 MCMM-predicted and measured *in vitro* SCFA production rates in the presence or absence of  
144 fiber supplementation, with better agreement in more diverse communities and over longer  
145 experimental incubation times (**Fig. 2-3**).

146

147 *MCMM predictions correspond with variable immunological responses to a 10-week high-fiber*  
148 *dietary intervention*

149 We next investigated whether MCMM-predicted SCFA production rates could be leveraged to  
150 help explain inter-individual differences in phenotypic response following a dietary intervention.  
151 Specifically, we looked at data from 18 individuals who were placed on a high-fiber diet for ten  
152 weeks<sup>26</sup>. These individuals fell into three distinct immunological response groups: one in which  
153 high inflammation was observed over the course of the intervention (high-inflammation group),  
154 and two other distinct response groups that both exhibited lower levels of inflammation (low-  
155 inflammation groups I and II; **Fig. 4A**). We hypothesized that these immune response groups  
156 could be explained, in part, by differences in MCMM-predicted SCFA production profiles. Using  
157 16S amplicon sequencing data from seven time points collected from each of these 18  
158 individuals over the 10-week intervention, we built MCMMs for each study participant at each  
159 time point in the study. Growth was then simulated for each model using a standardized high-  
160 fiber diet, rich in resistant starch (see Material and Methods). Throughout the study, individuals  
161 in the high-inflammation group showed significantly lower predicted butyrate plus propionate  
162 production on average (i.e., the two SCFAs with the strongest anti-inflammatory effects),  
163 compared to the individuals in each of the low-inflammation groups (High vs. Low I:  $284.6 \pm 7.7$   
164 vs  $327.5 \pm 3.8$  mmol/(gDW h) on average, Mann-Whitney  $p = 1.9e-5$ . High vs. Low II:  $284.6 \pm$   
165  $7.7$  vs  $337.8 \pm 6.4$  mmol/(gDW h), Mann-Whitney  $p = 7.2e-6$ ) (**Fig. 4B**). Predicted levels of  
166 butyrate plus propionate production in the high-inflammation group decreased throughout the

167 duration of the high-fiber intervention (Pearson  $r = -0.47$ , Pearson test,  $p = 4.7e-3$ ) (**Fig. 4C**),  
168 while predicted levels of butyrate and propionate production in the low-inflammation groups  
169 were constant over time (Low I: Pearson  $r = -0.020$ , Pearson test  $p = 0.90$ , Low II: Pearson  $r =$   
170  $0.093$ , Pearson test,  $p = 0.57$ ) (**Fig. 4C**). Acetate production did not appear to differ across  
171 groups (High vs. Low I:  $652.7 \pm 52.4$  vs  $639.8 \pm 79.3$  mmol/(gDW h) on average, Mann-Whitney  
172  $p = .99$ . High vs. Low II:  $652.7 \pm 52.4$  vs  $653.8 \pm 50.0$  mmol/(gDW h), Mann-Whitney  $p = .97$ .  
173 Low I vs. Low II:  $652.7 \pm 52.4$  vs  $639.8 \pm 79.3$  mmol/(gDW h), Mann-Whitney  $p = .80$ ) (**Fig.**  
174 **4D**), although there was a slight trend towards increasing acetate production over time in the  
175 high inflammation group (Pearson  $r = 0.18$ ,  $p = 0.31$ ) (**Fig. 4E**).

176

177 *MCOMM-predicted SCFA profiles are associated with a wide range of blood-based clinical*  
178 *markers*

179 To further evaluate the clinical relevance of personalized MCOMMs, we generated SCFA  
180 production rate predictions from stool 16S amplicon sequencing data for 2,687 individuals in a  
181 deeply phenotyped, generally-healthy cohort from the West Coast of the United States (i.e., the  
182 Arivale cohort)<sup>27</sup>. Baseline MCOMMs were built for each individual assuming the same dietary  
183 input (i.e., an average European diet) in order to compare SCFA production rate differences,  
184 independent of background dietary variation. MCOMM-predicted SCFA fluxes were then  
185 regressed against a panel of 128 clinical chemistries and health metrics collected from each  
186 individual, adjusting for a standard set of common covariates (i.e., age, sex, and microbiome  
187 sequencing vendor) (**Fig. 5A**). After FDR correction, 37 markers were significantly associated  
188 with the predicted production rate of at least one SCFA (**Fig. 5B**). Predicted butyrate production  
189 showed significant positive association with the health-associated hormone adiponectin, and  
190 significant inverse association with 11 metabolites associated with poorer health, including C-  
191 reactive protein (CRP), HOMA-IR, and low-density lipoprotein (LDL;  $P < 0.05$ , FDR-corrected

192 Wald test). Acetate showed significant positive associations with 23 blood metabolites and  
193 inverse associations with 11 metabolites (**Fig. 5B**), which tended to be in the opposite direction  
194 as the butyrate associations. Propionate showed no significant associations, while overall SCFA  
195 production showed 2 positive and 3 negative associations (**Fig. 5B**). Butyrate and propionate  
196 production tended to be positively correlated within an individual, while higher acetate  
197 production was inversely associated with both butyrate and propionate production (**Fig. 5C-D**).  
198 This inverse association may be responsible, in part, for the flipped associations with clinical  
199 chemistries between butyrate and acetate.

200

201

202 *Leveraging MCMs to design precision dietary, prebiotic, and probiotic interventions*

203

204 As a proof-of-concept for *in silico* engineering of the metabolic outputs of the human gut  
205 microbiome, we screened a set of potential interventions designed to increase SCFA production  
206 for individuals from the Arivale cohort (**Fig. 6A**). MCMs were built using two different dietary  
207 contexts: an average European diet, and a vegan, high-fiber diet (see Material and Methods).  
208 Predicted butyrate production rates were then compared across the two diets. As expected,  
209 models grown on a high-fiber diet showed higher average predicted butyrate production:  $27.35$   
210  $\pm 6.77$  mmol/(gDW h) vs  $16.17 \pm 6.22$  mmol/(gDW h), paired t-test,  $t = 92.74$ ,  $p < .001$  (**Fig. 6B**).  
211 However, this increase in butyrate production between the European and high-fiber diets was  
212 not uniform across individuals. On the high-fiber diet, some individual gut microbiota  
213 compositions showed very large increases in butyrate production, some showed little-to-no  
214 change, and a small subset of samples actually showed a decrease in butyrate production,  
215 relative to the European diet. We identified a set of ‘non-responders’ ( $n = 29$ ) who produced less  
216 than  $10 \frac{\square\square\square\square}{\square\square\square*\square}$  of butyrate on the European diet and showed an increase in butyrate production



217 of less than 20% on the high-fiber diet (**Fig. 6C**). We also identified a set of ‘regressors’ (n = 45)  
218 who produced more than 20  $\frac{\square\square\square\square}{\square\square\square*\square}$  of butyrate on the European diet and showed lower butyrate  
219 production on the high-fiber diet (**Fig. 6D**). We then simulated a handful of simple prebiotic and  
220 probiotic interventions across these individuals, to identify optimal intervention combinations for  
221 each individual (**Fig. 6C-E**). MCMMs for each subset of individuals were simulated with prebiotic  
222 and probiotic interventions in the context of either the European or the high-fiber diet.  
223 Specifically, diets were supplemented with the dietary fiber inulin, with the dietary fiber pectin, or  
224 with a simulated probiotic intervention that consisted of introducing 10% relative abundance of  
225 the butyrate-producing genus *Faecalibacterium* to the MCMM. In general, optimal combination  
226 interventions significantly increased the population-level butyrate production above either  
227 dietary intervention alone (**Fig. 6C-D**).

228 For 70/74 individuals, supplementation of the background diet with a specific pre- or  
229 probiotic increased the butyrate production rate (**Fig. 6C-E**). Neither response group had an  
230 intervention that was optimal for all individuals. In general, the most successful intervention for  
231 non-responders was the addition of inulin to the European diet (156.6%  $\pm$  183.3% increase vs  
232 standard European diet), and for regressors it was the addition of inulin to the high-fiber diet  
233 (88.2%  $\pm$  75.7% increase). However, the exact intervention that yielded the highest butyrate  
234 production for any given individual across both populations varied widely (**Fig. 6E**). For  
235 example, the probiotic intervention was more successful in raising predictions for butyrate  
236 production in non-responders than it was in regressors (**Fig. 6E**). The optimal intervention  
237 combination in the non-responder subpopulation was more heterogeneous than in the regressor  
238 subpopulation. Overall, no single intervention combination was optimal for every individual in the  
239 population.

240

241 **Discussion**

242 Here we present an approach to the rational engineering of SCFA production rates from the  
243 human gut microbiome through prebiotic, probiotic, and dietary interventions, validated using *in*  
244 *vitro* and *in vivo* experimental data. We demonstrated the MCMMs can be used to formulate  
245 personalized interventions designed to optimize SCFA production profiles.

246 Model predictions of butyrate production in synthetically constructed *in vitro* co-cultures  
247 showed significant agreement between measured and predicted butyrate fluxes (**Fig. 2**). Due to  
248 the phylogenetic resolution of 16S data and the lack of strain-level GEMs that match the  
249 organisms present in some samples, we built genus-level MCMMs for all analyses. The  
250 decreasing accuracy of butyrate predictions as community richness declined may reflect a  
251 limitation of building models at the genus-level, as reconstructions contain a summarized  
252 aggregation of the metabolic capability of the genus as a whole, without species- or strain-level  
253 resolution. Consequently, pathways included in the metabolic model may be absent in a low-  
254 richness experimental system, reflecting a mismatch between the modeling framework and  
255 reality. In high richness models, predictions became more accurate, indicating this mismatch is  
256 less impactful as more taxa are included in the system. Real-world microbiomes are often more  
257 species-rich than synthetic *in vitro* communities. Fortunately, we are likely not operating in a  
258 community regime where missingness in individual models has a large influence on genus-level  
259 MCMM SCFA predictions in the human gut. However, future work should focus on increasing  
260 the availability of diverse strain-level GEMs. The recent release of AGORA2<sup>28</sup>, containing GEMs  
261 for 7,302 microorganisms, may help to overcome this limitation and aid in the construction of  
262 MCMMs at finer levels of taxonomic resolution.

263 Data from *ex vivo* anaerobic fecal incubations showed agreement between SCFA flux  
264 predictions and measurements. Fiber-treated samples showed significant increases in both  
265 predicted and measured SCFA production, compared to the controls (**Fig. 3**). Additionally,  
266 measured and predicted production rates of butyrate and propionate showed quantitative

267 agreement across three independent studies. Acetate production rates were accurately  
268 predicted in all but one study. Acetate is known to act as an overflow metabolite<sup>29,30</sup>, with a  
269 wide range of possible fluxes for a given biomass optimum, so it is perhaps not surprising that  
270 the predictions for this metabolite tended to be less accurate. Finally, predictions were generally  
271 the weakest in Study C (**Fig. 3G-I**). One possible reason for poorer predictions in this study is  
272 that the incubation time was shorter than for the other two studies (4 hours in Study C, vs 7  
273 hours and 24 hours in Studies A and B, respectively), resulting in less divergence in  
274 accumulated SCFA concentrations between controls and treated samples. Thus, it is likely that  
275 SCFA levels did not build up to high enough levels in this study to accurately reflect *in situ*  
276 production. Overall, the observed correspondence between our SCFA production profile  
277 predictions and *in vitro* data provided us with some confidence in our MCMC modeling strategy  
278 and prompted us to explore how these predictions might be applied to an *in vivo* setting.

279 MCMCs built using data from a 10-week high-fiber dietary intervention allowed us to  
280 assess our predictions *in vivo* in the context of immunological responses to diet. Predictions of  
281 combined butyrate and propionate (i.e., SCFAs with the strongest anti-inflammatory effects on  
282 the host<sup>31</sup>) production rates over the course of the high-fiber intervention showed distinct  
283 differences between pre-defined immune response groups (**Fig. 4**). The low-inflammation  
284 groups showed stable butyrate and propionate production fluxes over time, while the high  
285 inflammation group showed lower average butyrate and propionate production and a decreasing  
286 production rate over time following the initiation of the high-fiber diet (**Fig. 4B-C**). Given the  
287 strong anti-inflammatory effects of butyrate and propionate, we expected to see lower  
288 production of these molecules in the context of higher inflammation. Prior work has shown that  
289 higher doses of inulin can actually induce an inflammatory response, which may explain, in part,  
290 the inflammatory immune response in these individuals<sup>32</sup>. Overall, our results indicate that

291 different immunological responses to a high fiber diet may be explained, in part, by the observed  
292 heterogeneity in MCOMM-predicted butyrate and propionate production rates (**Fig. 4**).

293 Several biomarkers of metabolic health, inflammation, liver function, and cardiovascular  
294 health were associated with MCOMM-predicted SCFA production profiles in a large, generally-  
295 healthy cohort, assuming an average European diet (**Fig. 5**). CRP, a marker of systemic  
296 inflammation<sup>33</sup>, showed a significant negative association with butyrate production predictions.  
297 Markers of cardiovascular health, such as LDL and triglyceride levels, were also negatively  
298 associated with butyrate production rates, supporting the role of butyrate as protective against  
299 cardiovascular disease<sup>34</sup>. Many significant associations were inverted when looking across  
300 butyrate and acetate flux predictions (**Fig. 5**). For instance, CRP, HOMA-IR, glucose, insulin,  
301 LDL cholesterol and uric acid all showed significant negative associations with butyrate  
302 production and significant positive associations with acetate production. This result may be  
303 related to the apparent tradeoff between acetate production and the production of both butyrate  
304 and propionate (**Fig. 5C-E**). While the overall production of SCFAs has been implicated in  
305 lowering inflammation<sup>35</sup>, the potency of butyrate in driving down inflammation and improving  
306 overall metabolic health is greater than that of acetate<sup>36</sup>, which, given this apparent tradeoff in  
307 the production of these different SCFAs, could help to explain these inverted associations.

308 Given this set of promising associations between SCFA predictions and host phenotypic  
309 variation, we next wanted to demonstrate the potential of MCOMMs for designing precision  
310 prebiotic, probiotic, and dietary interventions that optimize SCFA production profiles. Using the  
311 Arivale cohort, we identified two classes of individuals that responded differently to an *in silico*  
312 high-fiber dietary intervention: non-responders and regressors (**Fig. 6**). We found significant  
313 heterogeneity in the optimal intervention across individuals from each of these response groups,  
314 but most notably in the non-responders (**Fig. 6E**). Given that the non-responders had low  
315 baseline levels of butyrate production and did not respond to a high-fiber diet, this underscores

316 the importance of personalized predictions for those who tend not to respond well to population-  
317 scale interventions.

318 Personalized prediction of SCFA production profiles from human gut MCMs represents  
319 an important technological step forward in leveraging artificial intelligence for precision nutrition.  
320 Mechanistic modeling allowed us to translate the ecological composition of the gut microbiome  
321 into concrete, individual-specific metabolic outputs, in response to specific interventions<sup>37</sup>.  
322 MCMs are transparent models that do not require training data, with clear causal and  
323 mechanistic explanations behind each prediction. Microbially-produced metabolites have an  
324 substantial impact on host physiology and health<sup>38,39</sup>, and a rational framework for engineering  
325 the production or consumption rates of these metabolites has broad potential applications in  
326 precision nutrition and personalized healthcare.

327

328

## 329 **Materials and Methods**

### 330 *In vitro culturing*

331 Culturing of the synthetically assembled gut microbial communities is described in Clark et al.,  
332 2021<sup>25</sup>. Culturing of *ex vivo* samples in Study A was done using the methodology described  
333 below. Culturing of *ex vivo* samples in Study B is described in Cantu-Jungles et al., 2021<sup>14</sup>.  
334 Culturing of *ex vivo* samples in Study C was conducted by co-author Dr. Thomas Gurry, using  
335 the methodology described below.

336

### 337 *In vitro culturing of fecal-derived microbial communities (Study A)*

338 Fecal samples were collected in 1200 mL 2-piece specimen collectors (Medline, USA) in the  
339 Public Health Science Division of the Fred Hutchinson Cancer Center (IRB Protocol number  
340 5722) and transferred into an large vinyl anaerobic chamber (Coy, USA, 37°C, 5% hydrogen,

341 20% carbon dioxide, balanced with nitrogen) at the Institute for Systems Biology within 20  
342 minutes of defecation. All further processing and sampling was then run inside the anaerobic  
343 chamber. 50 g of fecal material was transferred into sterile 50 oz Filter Whirl-Paks (Nasco, USA)  
344 with sterile PBS + 0.1% L-cysteine at a 1:2.5 w/v ratio and homogenized with a Stomacher  
345 Biomaster (Seward, USA) for 15 minutes. After homogenization, each sample was transferred  
346 into three sterile 250 mL serum bottles and another 2.5 parts of PBS + 0.1% L-cysteine was  
347 added to bring the final dilution to 1:5 in PBS. 87 ug/mL inulin or an equal volume of sterile PBS  
348 buffer were added to treatment or control bottles, respectively. Samples were immediately  
349 pipetted onto sterile round-bottom 2 mL 96-well plates in triplicates. Baseline samples were  
350 aliquoted into sterile 1.5 mL Eppendorf tubes and the plates were covered with Breathe-Easy  
351 films (USA Scientific Inc., USA). Plates were incubated for 7 h at 37°C and gently vortexed  
352 every hour within the chamber. Final samples were aliquoted into 1.5 mL Eppendorf tubes at the  
353 end of incubation. Baseline and 7 h samples were kept on ice and immediately processed after  
354 sampling. 500 uL of each sample were aliquoted for metagenomics and kept frozen at -80°C  
355 before and during transfer to the commercial sequencing service (Diversigen, Inc). The  
356 remaining sample was transferred to a table-top centrifuge (Fisher Scientific accuSpin, USA)  
357 and spun at 1,500 rpm for 10 minutes. The supernatant was then transferred to collection tubes  
358 kept on dry ice and transferred to the commercial metabolomics provider Metabolon, USA, for  
359 targeted SCFA quantification.

360

### 361 *In vitro culturing of fecal-derived microbial communities (Study C)*

362 Homogenized fecal samples in this study again underwent anaerobic culturing at 37°C, as  
363 described above, but with a shorter culturing time of 4 hours. The slurry was diluted 2.5x in  
364 0.1% L-cysteine PBS buffer solution. Cultures were supplemented with the dietary fibers pectin  
365 or inulin to a final concentration of 10g/L, or a sterile PBS buffer control treatment. Aliquots were

366 taken at 0h and 4h and further processed for measurement of SCFA concentrations, which were  
367 used to estimate experimental production flux (concentration[4h] - concentration[0h]/4h). SCFA  
368 concentrations were measured using GC-FID. Briefly, the pH of the aliquots was adjusted to 2-3  
369 with 1% aqueous sulfuric acid solution, after which they were vortexed for 10 minutes and  
370 centrifuged for 10 minutes at 10,000 rpm. 200 uL aliquots of clear supernatant were transferred  
371 to vials containing 200 uL of MeCN and 100 uL of a 0.1% v/v 2-methyl pentanoic acid solution.  
372 The resulting solutions were analyzed by GC-FID on a Perkin Elmer Clarus 500 equipped with a  
373 DB-FFAP column (30m, 0.250mm diameter, 0.25um film) and a flame ionization detector.

374

#### 375 *Metagenomic sequencing and analysis*

376 For Study A, shallow metagenomic sequencing was performed by the sequencing vendor  
377 Diversigen, USA (i.e., their BoosterShot service). In brief, DNA was extracted from the fecal  
378 slurries with the DNeasy PowerSoil Pro Kit on a QiaCube HT (Qiagen, Germany) and quantified  
379 using the Qiant-iT Picogreen dsDNA Assay (Invitrogen, USA). Library preparation was  
380 performed with a proprietary protocol based on the Nextera Library Prep kit (Illumina, USA) and  
381 the generated libraries were sequenced on a NovaSeq (Illumina, USA) with a single-end 100bp  
382 protocol. Demultiplexing was performed using Illumina BaseSpace to generate the final FASTQ  
383 files used during analysis.

384 Preprocessing of raw sequencing reads was performed using FASTP<sup>40</sup>. The first 5bp on  
385 the 5' end of each read were trimmed, and the 3' end was trimmed using a sliding window  
386 quality filter that would trim the read as soon as the average window quality fell below 20. Reads  
387 containing ambiguous base calls or with a length of less than 15bp after trimming were removed  
388 from the analysis.

389 Bacterial species abundances were quantified using Kraken2 v2.0.8 and Bracken v2.2  
390 using the Kraken2 default database which was based on Refseq release 94, retaining only

391 those species with at least 10 assigned reads<sup>41,42</sup>. The analysis pipeline can be found at  
392 [https://github.com/Gibbons-Lab/pipelines/tree/master/shallow\\_shotgun](https://github.com/Gibbons-Lab/pipelines/tree/master/shallow_shotgun).

393

#### 394 *Metabolomics*

395 Targeted metabolomics were performed using Metabolon's high-performance liquid  
396 chromatography (HPLC)–mass spectrometry (MS) platform, as described before<sup>43</sup>. In brief,  
397 fecal supernatants were thawed on ice, proteins were removed using aqueous methanol  
398 extraction, and organic solvents were removed with a TurboVap (Zymark, USA). Mass  
399 spectroscopy was performed using a Waters ACQUITY ultra-performance liquid  
400 chromatography (UPLC) and Thermo Scientific Q-Exactive high resolution/accuracy mass  
401 spectrometer interfaced with a heated electrospray ionization (HESI-II) source and an Orbitrap  
402 mass analyzer operated at 35,000 mass resolution. For targeted metabolomics ultra-pure  
403 standards of the desired short-chain fatty acids were used for absolute quantification. Fluxes for  
404 individual metabolites were estimated as the rate of change of individual metabolites during the  
405 incubation period (concentration[7h] - concentration[0h]/7h).

406

#### 407 *Model Construction*

408 Taxonomic abundance data summarized to the genus level, inferred from 16S amplicon  
409 sequencing or shotgun metagenomic sequencing, were used to construct all MCMMs in this  
410 analysis using the community-scale metabolic modeling platform MICOM v0.32.3<sup>17</sup>. Models  
411 were built using the MICOM build() function with a relative abundance threshold of 0.001,  
412 omitting taxa that made up less than 0.1% relative abundance. The AGORA database (v1.03) of  
413 taxonomic reconstructions summarized to the genus level was used to collect genome-scale  
414 metabolic models for taxa present in each model. *In silico* media were applied to the grow()  
415 function, defining the bounds for metabolic imports by the MCMM. Medium composition varied



416 between analyses (see *Media Construction*). Steady state growth rates and fluxes for all  
417 samples were then inferred using cooperative tradeoff flux balance analysis (ctFBA). In brief,  
418 this is a two-step optimization scheme, where the first step finds the largest possible biomass  
419 production rate for the full microbial community and the second step infers taxon-specific growth  
420 rates and fluxes, while maintaining community growth within a fraction of the theoretical  
421 maximum (i.e., the tradeoff parameter), thus balancing individual growth rates and the  
422 community-wide growth rate<sup>17</sup>. For all models in the manuscript we used a tradeoff parameter  
423 of 0.7. This parameter value was chosen through cooperative tradeoff analysis in MICOM.  
424 Multiple parameters were tested, and the highest parameter value (i.e., the value closest to the  
425 maximal community growth rate at 1.0) that allowed most (>90%) of taxa to grow was chosen  
426 (i.e., 0.7). Predicted growth rates from the simulation were analyzed to validate correct behavior  
427 of the models. All models were found to grow with minimum community growth rate of 0.3 h<sup>-1</sup>.  
428 Predicted values for export fluxes of SCFAs were collected from each MCMM using the  
429 `production_rates()` function, which calculates the overall production from the community that  
430 would be accessible to the colonic epithelium.

431

#### 432 *Media Construction*

433 Individual media were constructed based on the context of each individual analysis. For the  
434 synthetic *in vitro* cultures conducted by Clark et al. (2021), a defined medium (DM38) was used  
435 that supported growth of all taxa used in the experiments, excluding *Faecalibacterium*  
436 *prausnitzii*. Manually mapping each component to the Virtual Metabolic Human database, we  
437 constructed an *in silico* medium with flux bounds scaled to component concentration. All  
438 metabolites were found in the database. Using the MICOM `fix_medium()` function, a minimal set  
439 of metabolites necessary for all models to grow to a minimum community growth rate of 0.3 h<sup>-1</sup>

440 was added to the medium - here, only iron(III) was added (*in silico* medium available here:  
441 [https://github.com/Gibbons-Lab/scfa\\_predictions/tree/main/media](https://github.com/Gibbons-Lab/scfa_predictions/tree/main/media)).

442 To mimic the medium used in *ex vivo* cultures of fecally-derived microbial communities,  
443 a diluted, carbon-stripped version of a standard European diet was used. First, a standard  
444 European diet was collected from the Virtual Metabolic Human database  
445 ([www.vmh.life/#nutrition](http://www.vmh.life/#nutrition))<sup>44</sup>. Components in the medium which could be imported by the host,  
446 as defined by an existing uptake reaction in the Recon3D model<sup>45</sup>, were diluted to 20% of their  
447 original flux, to adjust for absorption in the small intestine<sup>45</sup>. Additionally, host-supplied  
448 metabolites such as mucins and bile acids were added to the medium. As most carbon sources  
449 are consumed in the body and are likely not present in high concentrations in stool, this diet was  
450 then algorithmically stripped of carbon sources by removing metabolites with greater than six  
451 carbons and no nitrogen, to avoid removing nitrogen sources. Additionally, the remaining  
452 metabolites in the medium were diluted to 10% of their original flux, mimicking the nutrient-  
453 depleted fecal homogenate. This medium was also augmented using the `fix_medium()` function  
454 in MICOM. To simulate fiber supplementation, single fiber additions were made to the medium,  
455 either pectin (0.75 mmol/gDW\*h) or inulin (10.5 mmol/gDW\*h). Bounds for fiber  
456 supplementation were chosen to balance the carbon content of each, as represented in the  
457 model (pectin: 2535 carbons, inulin: 180 carbons).

458 For *in vivo* modeling, two diets were used: a high-fiber diet containing high levels of  
459 resistant starch, and a standard European diet<sup>44,46</sup>. Again, both diets were collected from the  
460 Virtual Metabolic Human database ([www.vmh.life/#nutrition](http://www.vmh.life/#nutrition)). Each medium was subsequently  
461 adjusted to account for absorption in the small intestine by diluting metabolite flux as described  
462 previously. Additionally, host-supplied metabolites such as mucins and bile acids were added to  
463 the medium, to match the composition of the medium *in vivo*. Finally, the `complete_medium()`  
464 function was again used to augment the medium, as described above.

465           Prebiotic interventions were designed by supplementing the high-fiber or average  
466 European diet with single fiber additions, either pectin or inulin. As before, bounds for fiber  
467 addition were set as 0.75 mmol/gDW\*h for pectin and 10.5 mmol/gDW\*h for inulin.

468

#### 469 *Probiotic Intervention*

470 To model a probiotic intervention, 10% relative abundance of the genus *Faecalibacterium*, a  
471 known butyrate-producing taxon<sup>47</sup>, was added to the MCMs by adding a pan-genus model of  
472 the taxon derived from the AGORA database version 1.03. Measured taxonomic abundances  
473 were scaled to 90% of their initial values, after which *Faecalibacterium* was artificially added to  
474 the model.

475

#### 476 *External Data Collection*

477 Data containing taxonomic abundance, optical density, and endpoint butyrate concentration for  
478 synthetically-constructed *in vitro* microbial cultures were collected from Clark et al. (2021)<sup>25</sup>.  
479 Endpoint taxonomic abundance data, calculated from fractional read counts collected via 16S  
480 amplicon sequencing, was used to construct individual MCMs for each co-culture (see *Model*  
481 *Construction*). Resulting models ranged in taxonomic richness from 1 to 25 taxa.

482           From a second study by Cantu-Jungles et al. (2021)<sup>14</sup> (*ex vivo* Study B), preprocessed  
483 taxonomic abundance and SCFA metabolomics data was collected. Homogenized fecal  
484 samples in this study underwent a similar culturing process, with a culturing time of 24 hours.  
485 Cultures were supplemented with the dietary fiber pectin, or a PBS control. Initial and endpoint  
486 metabolomic SCFA measurements were used to estimate experimental production flux  
487 (concentration[24h] - concentration[0h]/24h). Taxonomic abundance data was used to construct  
488 MCMs for each individual (see *Model Construction*).

489 Data from a third (Study C) was collected from the Pharmaceutical Biochemistry Group  
490 at the University of Geneva, Switzerland, under study protocol 2019-00632, containing  
491 sequencing data in FASTQ format and targeted metabolomics SCFA measurements.

492 Data was collected from Wastyk, et al 2021 <sup>26</sup>, which provided 16S amplicon sequencing  
493 data at 9 timepoints spanning 14 weeks, along with immunological phenotyping, for 18  
494 participants undergoing a high-fiber dietary intervention. Only 7 timepoints spanning 10 weeks  
495 were included in subsequent analysis, as the last 2 timepoints were taken after the conclusion  
496 of the dietary intervention. MCMs were constructed for each participant at each timepoint at  
497 the genus level (see *Model Construction*). Mean total butyrate and propionate production, as  
498 well as acetate production, were compared between immune response groups.

499 De-identified data was obtained from a former scientific wellness program run by Arivale,  
500 Inc. (Seattle, WA) <sup>27</sup>. Arivale closed its operations in 2019. Taxonomic abundances, inferred  
501 from 16S amplicon sequencing data, for 2,687 research-consenting individuals were collected  
502 and used to construct MCMs. 128 paired blood-based clinical chemistries taken within 30  
503 days of fecal sampling were also collected and used to find associations between MCM SCFA  
504 predictions on a standard European diet and clinical markers.

505

### 506 *Statistical analysis*

507 Statistical analysis was performed using SciPy (v1.9.1) and statsmodels (v0.14.0) in Python  
508 (v3.8.13). Pearson correlation coefficients and p-values were calculated between measured and  
509 predicted SCFA production fluxes in *in vitro* cultures, as well as for predicted SCFA production  
510 fluxes across timepoints for an *in vivo* high-fiber intervention. Significance in overall SCFA  
511 production between immune response groups in the high-fiber intervention was determined by  
512 pairwise Mann-Whitney U test for butyrate+propionate production and for acetate production.  
513 Association of MCM-predicted SCFA production flux with paired blood-based clinical labs was

514 tested using OLS regression, adjusting for age, sex, microbiome sequencing vendor, and  
515 clinical lab vendor, and tested for significance by two-sided Wald test. BMI was not included as  
516 a confounder in the analysis because it was itself negatively correlated with butyrate production  
517 <sup>48</sup>. Multiple comparison correction for p-values was done using the Benjamini–Hochberg method  
518 for adjusting the False Discovery Rate (FDR) <sup>49</sup>. Comparison of butyrate production between  
519 dietary interventions was tested using paired Student's t-tests. In all analyses, significance was  
520 considered at the  $p < 0.05$  threshold.

521

#### 522 *Data, Software, and Code Availability*

523 Code used to run analysis and create figures for this manuscript can be found at

524 [https://github.com/Gibbons-Lab/scfa\\_predictions](https://github.com/Gibbons-Lab/scfa_predictions).

525

526 Processed data for synthetically constructed cultures can be found at

527 <https://github.com/RyanLincolnClark/DesignSyntheticGutMicrobiomeAssemblyFunction>. Raw

528 sequencing data can be found at <https://doi.org/10.5281/zenodo.4642238>.

529

530 Raw sequencing data for Study A can be found in the NCBI SRA under accession number

531 PRJNA937304.

532

533 Processed data for *ex vivo* Study B can be found at

534 [https://github.com/ThaisaJungles/fiber\\_specificity](https://github.com/ThaisaJungles/fiber_specificity). Raw sequencing data can be found in the

535 NCBI SRA under accession number PRJNA640404.

536

537 Raw sequencing data for *ex vivo* Study C can be found in the NCBI SRA under accession

538 number PRJNA939256.

539

540 Qualified researchers can access the full Arivale deidentified dataset supporting the findings in  
541 this study for research purposes through signing a Data Use Agreement (DUA). Inquiries to  
542 access the data can be made at [data-access@isbscience.org](mailto:data-access@isbscience.org) and will be responded to within 7  
543 business days.

544

#### 545 *Acknowledgements*

546 We thank members of the Gibbons Lab for helpful discussions and suggestions regarding this  
547 work. Thanks to Nathan Price, Amy Willis, Lauren Rajakovich, and Ophelia Venturelli for helpful  
548 comments and suggestions.

549

#### 550 *Funding*

551 This research was funded by Washington Research Foundation Distinguished Investigator  
552 Award and by startup funds from the Institute for Systems Biology (to SMG). Fecal sample  
553 collection at Fred Hutchinson Cancer Center was supported by P30 CA015704. Research  
554 reported in this publication was supported by the National Institute of Diabetes and Digestive  
555 and Kidney Diseases of the National Institutes of Health (NIH) under award no. R01DK133468  
556 (to SMG), as well as the National Institute on Aging of the National Institutes of Health (NIH)  
557 under award no. U19AG023122 (to NR).

558

#### 559 *Author contributions*

560 N.B., S.M.G. and C.D. conceptualized the study. N.B. ran the analyses, interpreted results and  
561 authored the first draft of the manuscript. S.M.G. and C.D. provided funding, materials and  
562 resources for the work, and supervised the work. J.W.L., L.L., and T.G. contributed data and

563 resources. T.W. and N.R. provided support with analyses and statistical interpretation. All  
564 authors reviewed and edited the manuscript.

565  
566  
567  
568  
569

## Citations

- 570 1. Oliphant, K. & Allen-Vercoe, E. Macronutrient metabolism by the human gut microbiome:  
571 major fermentation by-products and their impact on host health. *Microbiome* **7**, 91 (2019).
- 572 2. Rackerby, B., Van De Grift, D., Kim, J. H. & Park, S. H. Effects of Diet on Human Gut  
573 Microbiome and Subsequent Influence on Host Physiology and Metabolism. *Gut*  
574 *Microbiome and Its Impact on Health and Diseases* 63–84 Preprint at  
575 [https://doi.org/10.1007/978-3-030-47384-6\\_3](https://doi.org/10.1007/978-3-030-47384-6_3) (2020).
- 576 3. Tomasova, L., Grman, M., Ondrias, K. & Ufnal, M. The impact of gut microbiota metabolites  
577 on cellular bioenergetics and cardiometabolic health. *Nutr. Metab.* **18**, 72 (2021).
- 578 4. Glotfelty, L. G., Wong, A. C. & Levy, M. Small molecules, big effects: microbial metabolites  
579 in intestinal immunity. *Am. J. Physiol. Gastrointest. Liver Physiol.* **318**, G907–G911 (2020).
- 580 5. Donia, M. S. & Fischbach, M. A. HUMAN MICROBIOTA. Small molecules from the human  
581 microbiota. *Science* **349**, 1254766 (2015).
- 582 6. Diener, C. *et al.* Genome-microbiome interplay provides insight into the determinants of the  
583 human blood metabolome. *Nat Metab* **4**, 1560–1572 (2022).
- 584 7. Ríos-Covián, D. *et al.* Intestinal Short Chain Fatty Acids and their Link with Diet and Human  
585 Health. *Front. Microbiol.* **7**, 185 (2016).
- 586 8. Nogal, A., Valdes, A. M. & Menni, C. The role of short-chain fatty acids in the interplay  
587 between gut microbiota and diet in cardio-metabolic health. *Gut Microbes* **13**, 1–24 (2021).
- 588 9. Silva, Y. P., Bernardi, A. & Frozza, R. L. The Role of Short-Chain Fatty Acids From Gut  
589 Microbiota in Gut-Brain Communication. *Frontiers in Endocrinology* vol. 11 Preprint at

- 590 <https://doi.org/10.3389/fendo.2020.00025> (2020).
- 591 10. Morrison, D. J. & Preston, T. Formation of short chain fatty acids by the gut microbiota and  
592 their impact on human metabolism. *Gut Microbes* **7**, 189–200 (2016).
- 593 11. Cong, J., Zhou, P. & Zhang, R. Intestinal Microbiota-Derived Short Chain Fatty Acids in  
594 Host Health and Disease. *Nutrients* **14**, (2022).
- 595 12. Tan, J. *et al.* The role of short-chain fatty acids in health and disease. *Adv. Immunol.* **121**,  
596 91–119 (2014).
- 597 13. Mortensen, P. B. & Clausen, M. R. Short-chain fatty acids in the human colon: relation to  
598 gastrointestinal health and disease. *Scand. J. Gastroenterol. Suppl.* **216**, 132–148 (1996).
- 599 14. Cantu-Jungles, T. M. *et al.* Dietary Fiber Hierarchical Specificity: the Missing Link for  
600 Predictable and Strong Shifts in Gut Bacterial Communities. *MBio* **12**, e0102821 (2021).
- 601 15. Healey, G. R., Murphy, R., Brough, L., Butts, C. A. & Coad, J. Interindividual variability in  
602 gut microbiota and host response to dietary interventions. *Nutr. Rev.* **75**, 1059–1080  
603 (2017).
- 604 16. Boets, E. *et al.* Quantification of in Vivo Colonic Short Chain Fatty Acid Production from  
605 Inulin. *Nutrients* **7**, 8916–8929 (2015).
- 606 17. Diener, C., Gibbons, S. M. & Resendis-Antonio, O. MICOM: Metagenome-Scale Modeling  
607 To Infer Metabolic Interactions in the Gut Microbiota. *mSystems* **5**, (2020).
- 608 18. van Deuren, T., Blaak, E. E. & Canfora, E. E. Butyrate to combat obesity and obesity-  
609 associated metabolic disorders: Current status and future implications for therapeutic use.  
610 *Obes. Rev.* **23**, e13498 (2022).
- 611 19. Zeevi, D. *et al.* Personalized Nutrition by Prediction of Glycemic Responses. *Cell* **163**,  
612 1079–1094 (2015).
- 613 20. Rein, M. *et al.* Effects of personalized diets by prediction of glycemic responses on  
614 glycemic control and metabolic health in newly diagnosed T2DM: a randomized dietary



- 615 intervention pilot trial. *BMC Med.* **20**, 56 (2022).
- 616 21. Gibbons, S. M. *et al.* Perspective: Leveraging the Gut Microbiota to Predict Personalized  
617 Responses to Dietary, Prebiotic, and Probiotic Interventions. *Adv. Nutr.* **13**, 1450–1461  
618 (2022).
- 619 22. Heinken, A. *et al.* Genome-scale metabolic reconstruction of 7,302 human microorganisms  
620 for personalized medicine. *Nat. Biotechnol.* (2023) doi:10.1038/s41587-022-01628-0.
- 621 23. Abdill, R. J., Adamowicz, E. M. & Blekhman, R. Public human microbiome data are  
622 dominated by highly developed countries. *PLoS Biol.* **20**, e3001536 (2022).
- 623 24. Magnúsdóttir, S. *et al.* Generation of genome-scale metabolic reconstructions for 773  
624 members of the human gut microbiota. *Nat. Biotechnol.* **35**, 81–89 (2017).
- 625 25. Clark, R. L. *et al.* Design of synthetic human gut microbiome assembly and butyrate  
626 production. *Nat. Commun.* **12**, 3254 (2021).
- 627 26. Wastyk, H. C. *et al.* Gut-microbiota-targeted diets modulate human immune status. *Cell*  
628 **184**, 4137–4153.e14 (2021).
- 629 27. Manor, O. *et al.* Health and disease markers correlate with gut microbiome composition  
630 across thousands of people. *Nat. Commun.* **11**, 5206 (2020).
- 631 28. Heinken, A. *et al.* AGORA2: Large scale reconstruction of the microbiome highlights wide-  
632 spread drug-metabolising capacities. *bioRxiv* 2020.11.09.375451 (2020)  
633 doi:10.1101/2020.11.09.375451.
- 634 29. Valgepea, K. *et al.* Systems biology approach reveals that overflow metabolism of acetate  
635 in *Escherichia coli* is triggered by carbon catabolite repression of acetyl-CoA synthetase.  
636 *BMC Syst. Biol.* **4**, 166 (2010).
- 637 30. Wolfe, A. J. The acetate switch. *Microbiol. Mol. Biol. Rev.* **69**, 12–50 (2005).
- 638 31. Li, M. *et al.* Pro- and anti-inflammatory effects of short chain fatty acids on immune and  
639 endothelial cells. *Eur. J. Pharmacol.* **831**, 52–59 (2018).

- 640 32. Arifuzzaman, M. *et al.* Inulin fibre promotes microbiota-derived bile acids and type 2  
641 inflammation. *Nature* **611**, 578–584 (2022).
- 642 33. Sproston, N. R. & Ashworth, J. J. Role of C-Reactive Protein at Sites of Inflammation and  
643 Infection. *Front. Immunol.* **9**, 754 (2018).
- 644 34. Amiri, P. *et al.* Role of Butyrate, a Gut Microbiota Derived Metabolite, in Cardiovascular  
645 Diseases: A comprehensive narrative review. *Front. Pharmacol.* **12**, 837509 (2021).
- 646 35. Vinolo, M. A. R., Rodrigues, H. G., Nachbar, R. T. & Curi, R. Regulation of inflammation by  
647 short chain fatty acids. *Nutrients* **3**, 858–876 (2011).
- 648 36. Tedelind, S., Westberg, F., Kjerrulf, M. & Vidal, A. Anti-inflammatory properties of the short-  
649 chain fatty acids acetate and propionate: a study with relevance to inflammatory bowel  
650 disease. *World J. Gastroenterol.* **13**, 2826–2832 (2007).
- 651 37. Gurry, T., Nguyen, L. T. T., Yu, X. & Alm, E. J. Functional heterogeneity in the fermentation  
652 capabilities of the healthy human gut microbiota. *PLoS One* **16**, e0254004 (2021).
- 653 38. Gasaly, N., de Vos, P. & Hermoso, M. A. Impact of Bacterial Metabolites on Gut Barrier  
654 Function and Host Immunity: A Focus on Bacterial Metabolism and Its Relevance for  
655 Intestinal Inflammation. *Front. Immunol.* **12**, 658354 (2021).
- 656 39. Agus, A., Clément, K. & Sokol, H. Gut microbiota-derived metabolites as central regulators  
657 in metabolic disorders. *Gut* **70**, 1174–1182 (2021).
- 658 40. Chen, S., Zhou, Y., Chen, Y. & Gu, J. fastp: an ultra-fast all-in-one FASTQ preprocessor.  
659 *Bioinformatics* **34**, i884–i890 (2018).
- 660 41. Wood, D. E., Lu, J. & Langmead, B. Improved metagenomic analysis with Kraken 2.  
661 *Genome Biol.* **20**, 257 (2019).
- 662 42. Lu, J., Breitwieser, F. P., Thielen, P. & Salzberg, S. L. Bracken: estimating species  
663 abundance in metagenomics data. *PeerJ Comput. Sci.* **3**, e104 (2017).
- 664 43. Gauglitz, J. M. *et al.* Enhancing untargeted metabolomics using metadata-based source

- 665 annotation. *Nat. Biotechnol.* **40**, 1774–1779 (2022).
- 666 44. Elmadfa, I. Österreichischer Ernährungsbericht 2012. **1**, (2012).
- 667 45. Brunk, E. *et al.* Recon3D enables a three-dimensional view of gene variation in human  
668 metabolism. *Nat. Biotechnol.* **36**, 272–281 (2018).
- 669 46. Waldmann, A., Koschizke, J. W., Leitzmann, C. & Hahn, A. Dietary intakes and lifestyle  
670 factors of a vegan population in Germany: results from the German Vegan Study. *Eur. J.*  
671 *Clin. Nutr.* **57**, 947–955 (2003).
- 672 47. Zhou, L. *et al.* Faecalibacterium prausnitzii Produces Butyrate to Maintain Th17/Treg  
673 Balance and to Ameliorate Colorectal Colitis by Inhibiting Histone Deacetylase 1. *Inflamm.*  
674 *Bowel Dis.* **24**, 1926–1940 (2018).
- 675 48. Coppola, S., Avagliano, C., Calignano, A. & Berni Canani, R. The Protective Role of  
676 Butyrate against Obesity and Obesity-Related Diseases. *Molecules* **26**, (2021).
- 677 49. Benjamini, Y. & Hochberg, Y. Controlling the false discovery rate: A practical and powerful  
678 approach to multiple testing. *J. R. Stat. Soc.* **57**, 289–300 (1995).

679  
680  
681  
682  
683  
684  
685  
686  
687  
688  
689  
690  
691  
692  
693  
694  
695  
696

## 697 Figure Captions

698

699 **Figure 1. Microbial community-scale metabolic models (MCMMs) predict personalized SCFA**  
700 **production profiles.** Schematic of our workflow for validating MCMM-based personalized predictions  
701 for SCFA production. **(A)** Prior to modeling, an *in silico* medium is constructed, containing a matched  
702 diet mapped to its constituent metabolic components. The medium is depleted in compounds absorbed  
703 by the host in the small intestine and augmented with other host-supplied compounds, in addition to  
704 adding a minimal set of metabolites required for growth. **(B)** MCMMs are constructed, combining  
705 abundance and taxonomic data with pre-curated GEMs into a community model. **(C)** Growth in the  
706 MCMM is simulated through cooperative tradeoff flux balance analysis (ctFBA), yielding predicted  
707 growth rates and SCFA production fluxes. **(D)** To validate predicted levels of SCFA production fluxes,  
708 measured values of production fluxes are collected from fecal samples cultured anaerobically *ex vivo* at  
709 37°C over time. **(E)** Predicted and measured SCFA production fluxes are compared to assess the  
710 accuracy of the model.  
711

712 **Figure 2. Relationship between predicted and measured butyrate production rates in *in***  
713 ***vitro* co-cultures.** Each point denotes one of 1,387 anaerobic co-culture assays. Butyrate  
714 production flux predictions from MCMMs are shown on the y-axes and measured values are  
715 shown on the x-axes, along with  $R^2$  and p-values from a Pearson's correlation **(A)** Synthetically  
716 constructed communities were cultured anaerobically in a defined medium. Endpoint butyrate  
717 concentration was measured and compared with MCMM-predicted flux. **(B)** Predicted and  
718 measured butyrate fluxes in models of low richness synthetic communities (1-5 genera per  
719 model, N = 882). **(C)** Predicted and measured butyrate fluxes in models of high richness  
720 synthetic communities (10-25 genera, N = 697). In (B-C) the dashed line denotes a linear model  
721 fit to the data.  
722

723 **Figure 3. Human stool *ex vivo* assays show quantitative agreement between measured**  
724 **and predicted SCFA production fluxes.** SCFA production flux predictions from MCMMs are  
725 shown on the y-axes and measured values are shown on the x-axes, along with  $R^2$  and p-  
726 values from a Pearson's correlation. Marginal rug plots show separation in SCFA production  
727 between treatment groups. Error bars show standard error as calculated from measured and  
728 predicted values for each sample in triplicate. **(A-C)**, Results from a two-donor *ex vivo* study  
729 (Study A) showed significant agreement between measured and prediction rates for all three  
730 SCFAs following inulin treatment. **(D-F)** Results from Study B<sup>14</sup>, which included pectin  
731 treatments to stool homogenates from 10 individuals<sup>14</sup>. Samples showed significant association  
732 between predicted and measured production rates for all three SCFAs. **(G-I)** Results from Study  
733 C, which included both pectin and inulin interventions across stool homogenates from 9  
734 individuals. Samples treated with inulin and pectin showed significant associations between  
735 predicted and measured fluxes for both propionate and butyrate, but not for acetate.  
736

737 **Figure 4. Predicted SCFA production profiles were associated with variable immune**  
738 **response groups following a high-fiber dietary intervention.** **(A)** Summary of the study from  
739 Wastyk et al.<sup>26</sup>, where a cohort of 18 individuals participated in a 10-week high-fiber dietary  
740 intervention. Immune profiling based on circulating inflammatory cytokines and immune cells  
741 clustered individuals into three groups: two low-inflammation groups and one high-inflammation  
742 group. **(B)** Average predicted total butyrate and propionate production across the three immune-

743 response groups identified in the original study. **(C)** Predicted total butyrate and propionate  
744 production rates across the duration of the intervention, stratified by immune response group  
745 **(D)** Average predicted total acetate production across the three immune response groups. **(E)**  
746 Predicted acetate production rates across the intervention, stratified by immune response  
747 group. In (A-E) stars denote significance under an Independent Student's t-test, \*\*\* =  $p < 0.001$ .  
748

749 **Figure 5. SCFA flux predictions are significantly associated with blood-derived clinical**  
750 **markers. (A)** MCMMs were constructed for 2,687 Arivale participants, assuming an average  
751 European diet, to predict SCFA production profiles. SCFA predictions were regressed against a  
752 set of 128 blood-based clinical labs and health markers, with sex, age, and sequencing vendor  
753 as covariates in the regressions. **(B)** Heatmap showing the 37 significant associations (FDR-  
754 corrected Wald test  $p < 0.05$ ) between measured blood markers and predicted SCFA production  
755 rates. **(C-E)** Relationship between pairs of predicted SCFA production rates. Each dot denotes  
756 an individual model reconstructed for a single sample in the Arivale study ( $n=2,687$ ). The black  
757 line denotes a linear regression line and the gray area denotes the 95% confidence interval of  
758 the regression.  $R^2$  and  $p$ -values from Pearson's correlations.  
759

760 **Figure 6. Microbial MCMMs can be used to design, build, and test personalized prebiotic,**  
761 **probiotic, and dietary interventions aimed at optimizing SCFA production profiles. (A)**  
762 MCMMs built from the Arivale cohort ( $N = 2,687$ ) were used to test personalized responses to  
763 dietary interventions. Personalized models were simulated on an average European (Euro) diet,  
764 as well as on a high-fiber diet, and divided into responders, non-responders, and regressors,  
765 based on the changes in predicted butyrate production in response to increasing dietary fiber.  
766 Non-responders were defined as individuals who produced less than  $10 \frac{\square\square\square\square}{\square\square\square*\square}$  of butyrate on the  
767 European diet and showed an increase of less than 20% in butyrate production on the high-fiber  
768 diet. Regressors were defined as individuals who produced at least  $20 \frac{\square\square\square\square}{\square\square\square*\square}$  butyrate on the  
769 European diet and showed a drop in butyrate production on the high-fiber diet. Single-fiber and  
770 probiotic interventions were applied to non-responders and regressors. **(B)** Distribution of  
771 butyrate production rates on two different diets simulated for all participants in the study.  
772 Butyrate production ranges that contain non-responders ( $N=29$ ) and regressors ( $N=45$ ) are  
773 highlighted in green and yellow shaded areas, respectively. **(C)** Distributions of butyrate  
774 production rates for the non-responder group ( $N=29$ ). The optimal intervention resulting in the  
775 highest butyrate production is shown in blue. **(D)** Butyrate production rates for the regressor  
776 group ( $N=45$ ). The optimal intervention that resulted in the highest butyrate production is shown  
777 in blue. **(E)** Heatmap of butyrate production rates across simulated interventions for the  
778 individuals in the non-responder and regressor groups. Rows denotes specific interventions  
779 (Euro - average European diet, HF - high fiber diet). Columns denote individuals in the response  
780 groups ( $N=74$ ). Cell shading (white-to-red) denotes butyrate production rate. Added  
781 interventions tested on both non-responders and regressors included probiotic supplementation  
782 (inulin or pectin) as well as prebiotic supplementation (10% relative abundance  
783 *Faecalibacterium*). The most successful intervention for each individual is denoted by a black  
784 border around that cell in the corresponding column.

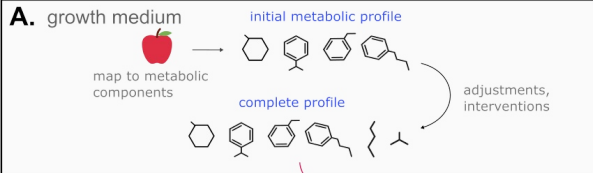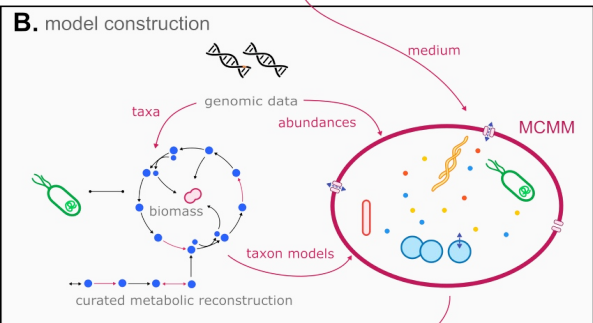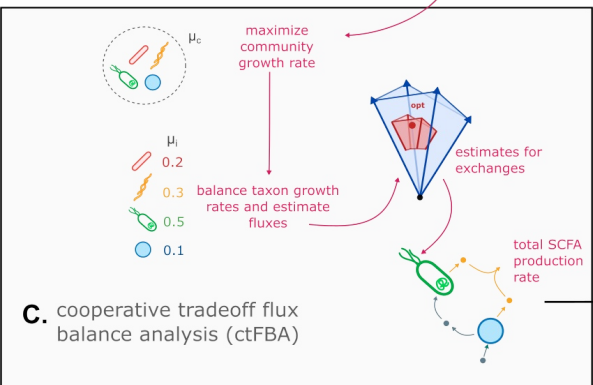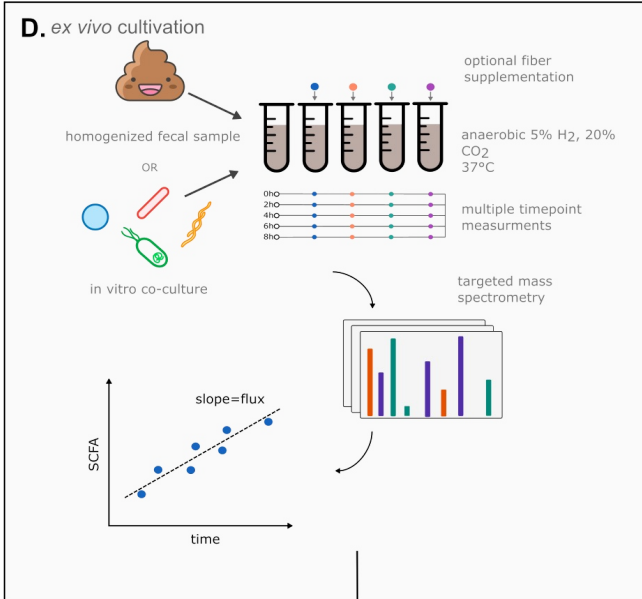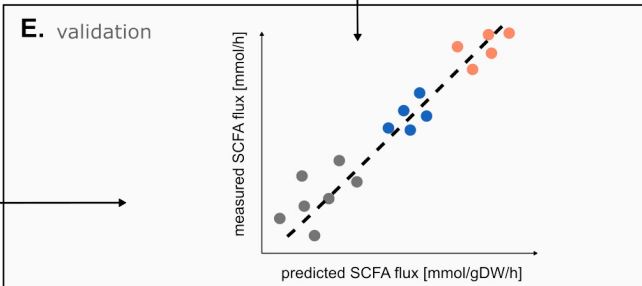

**A.**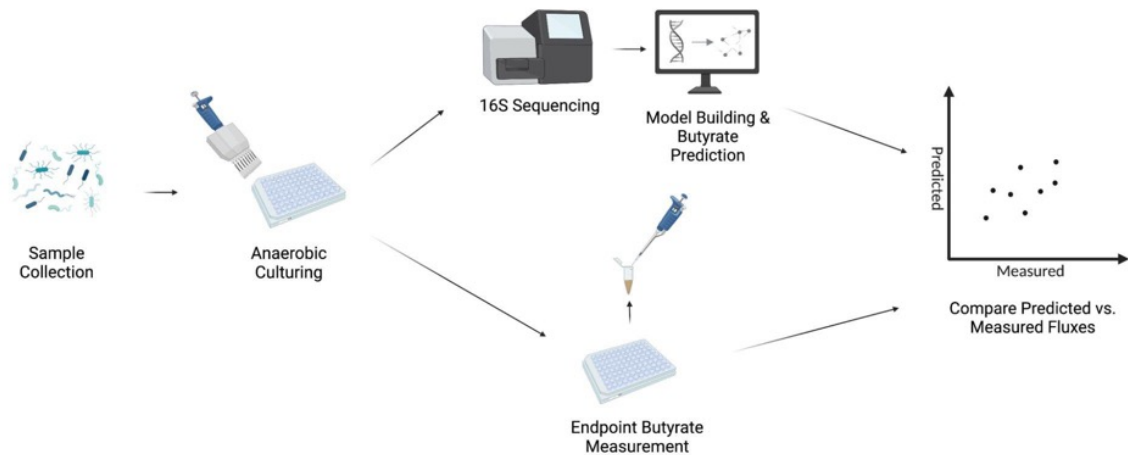**B.**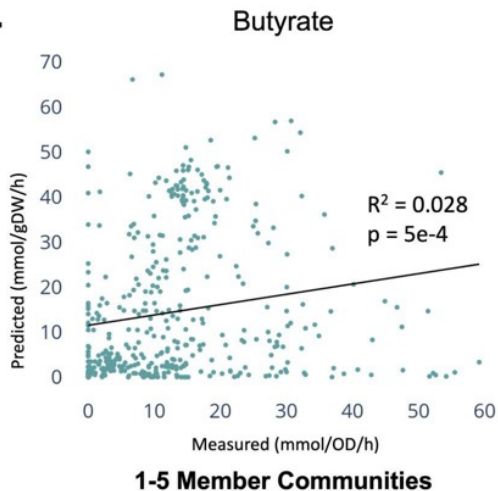**C.**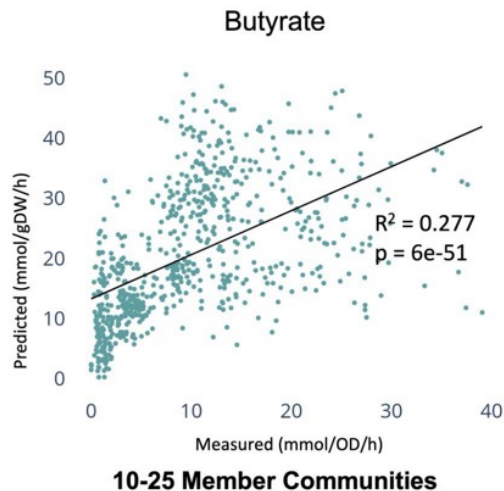

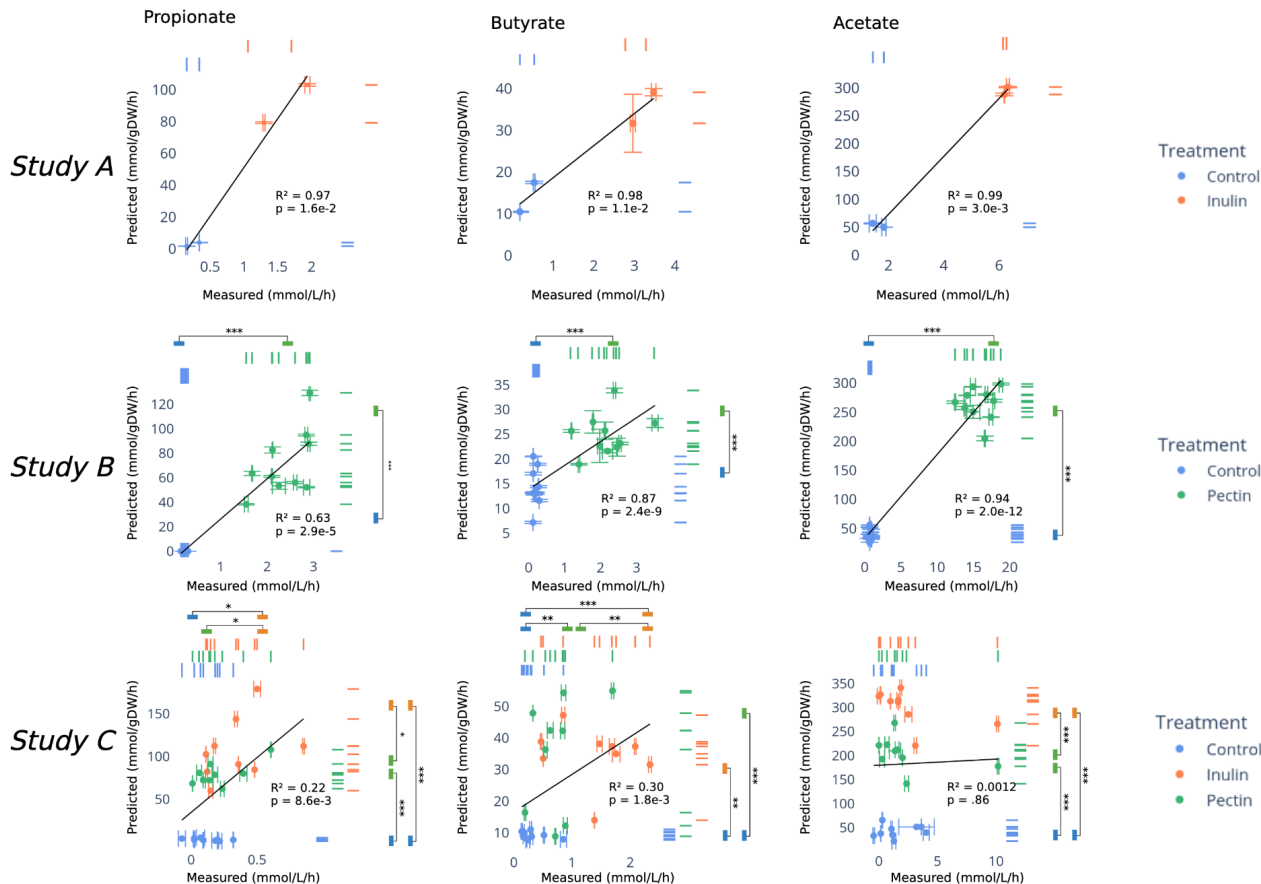



**A.**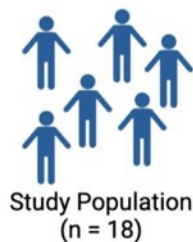

10 week high-fiber  
dietary intervention

- Inflammatory cytokines
- Cell signaling markers
- 16S sequencing

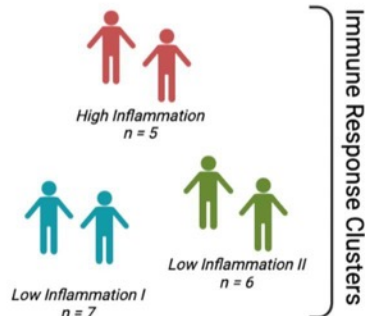**B.**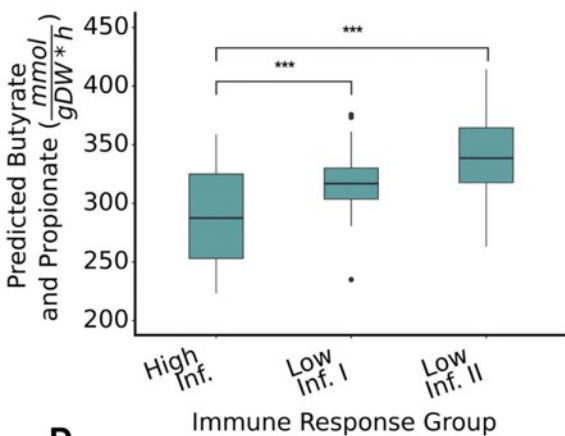**C.**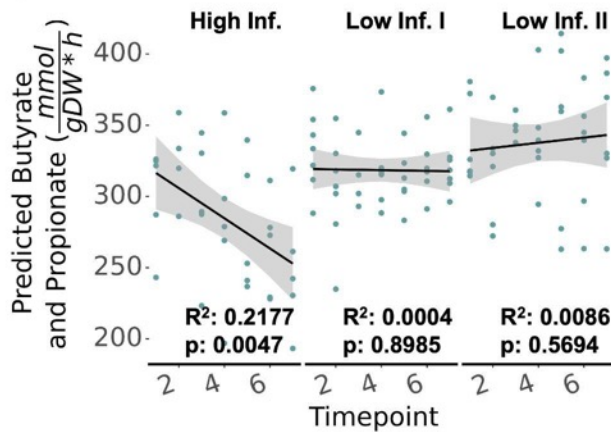**D.**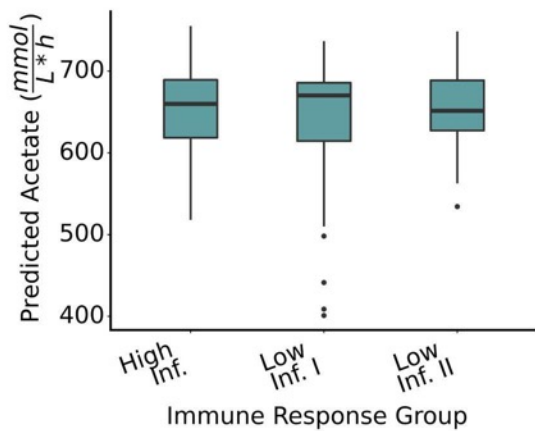**E.**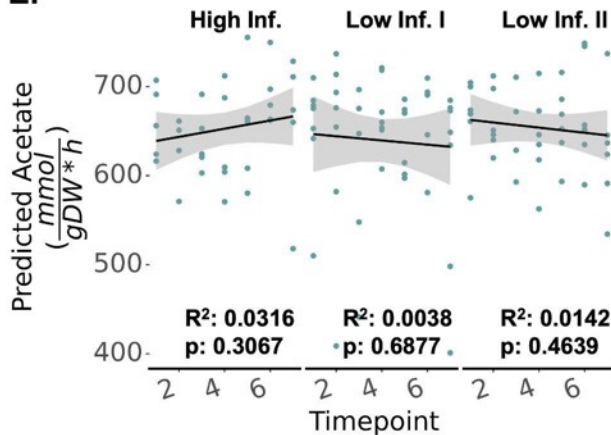

**A.**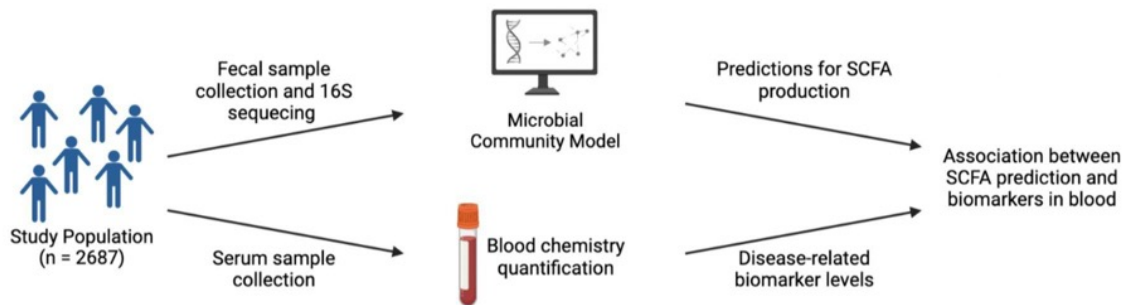**B.**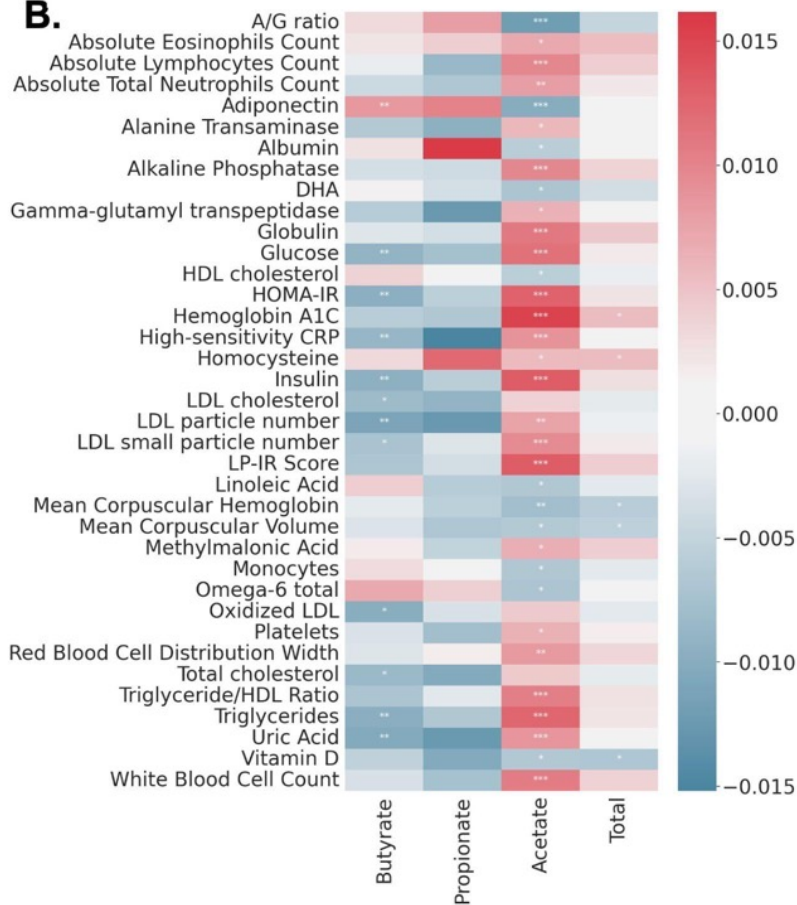**C.**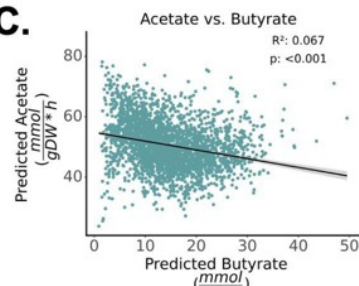**D.**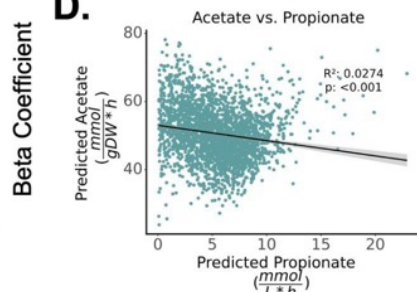**E.**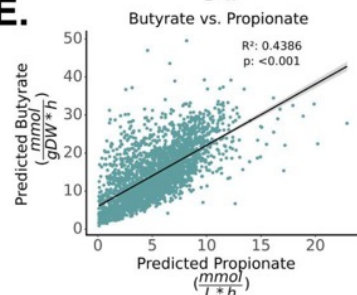

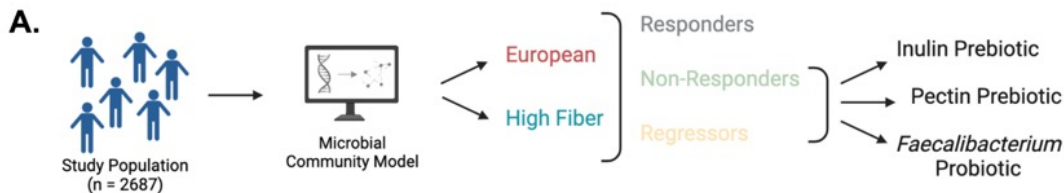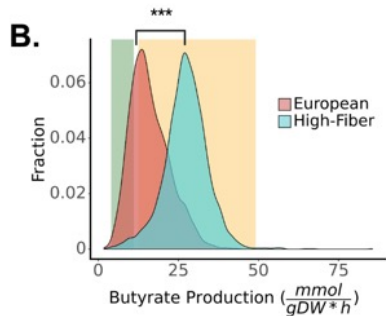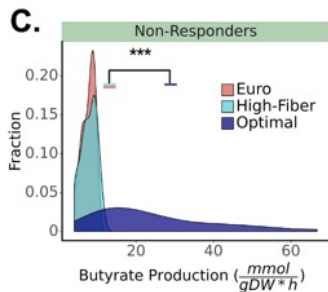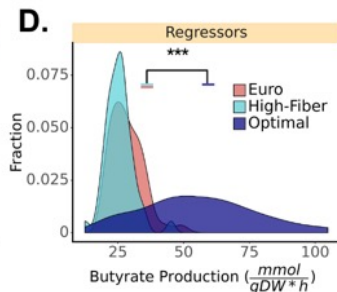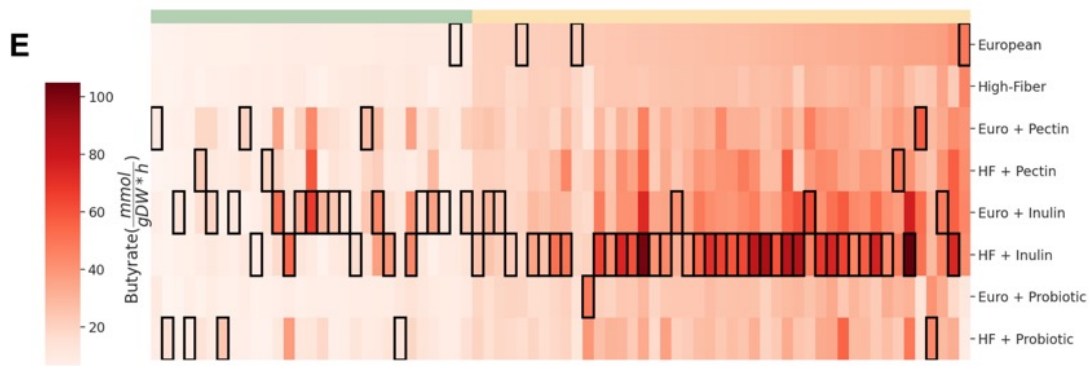

Source: https://www.biorxiv.org/content/10.1101/2023.02.28.530516v1.full.pdf
